# Supplementary material for: Star-poly(ε-caprolactone) as the stationary phase for capillary gas chromatographic separation
Source: Royal Society of Chemistry journal article supplement (doi:10.1039/c9ra05085j), 2019-01-01
Supplement: c9ra05085j1.pdf [file c9ra05085j1.pdf]

## Supplementary materials

### Star-poly( $\epsilon$ -caprolactone) as stationary phase for capillary gas chromatographic separations

Tao Sun<sup>a\*</sup>, Xingxing Jiang<sup>a</sup>, Qianqian Song<sup>a</sup>, Xiaomin Shuai<sup>b</sup>, Yujie Chen<sup>a</sup>, Xinyu  
Zhao<sup>a</sup>, Zhiqiang Cai<sup>b\*</sup>, Ke Li<sup>c</sup>, Xiaoguang Qiao<sup>a,d</sup>, and Shaoqiang Hu<sup>a</sup>

<sup>a</sup> *College of Chemistry and Chemical Engineering, Henan Key Laboratory of  
Function-Oriented Porous Materials, Luoyang Normal University, Luoyang 471934,  
P. R. China*

<sup>b</sup> *School of Petrochemical Engineering, Shenyang University of Technology,  
Liaoyang, 111003, Liaoning, P. R. China*

<sup>c</sup> *College of Food and Drug, Luoyang Normal University, Luoyang 471934, P. R.  
China*

<sup>d</sup> *Henan Joint International Research Laboratory of Living Polymerizations and  
Functional Nanomaterials, Henan Key Laboratory of Advanced Nylon Materials and  
Application, School of Materials Science and Engineering, Zhengzhou University,  
Zhengzhou 450001, P. R. China*

\* Corresponding author.

E-mail addresses: [suntao2226@163.com](mailto:suntao2226@163.com) (T. Sun); [kahongzqc@163.com](mailto:kahongzqc@163.com) (Z. Cai)

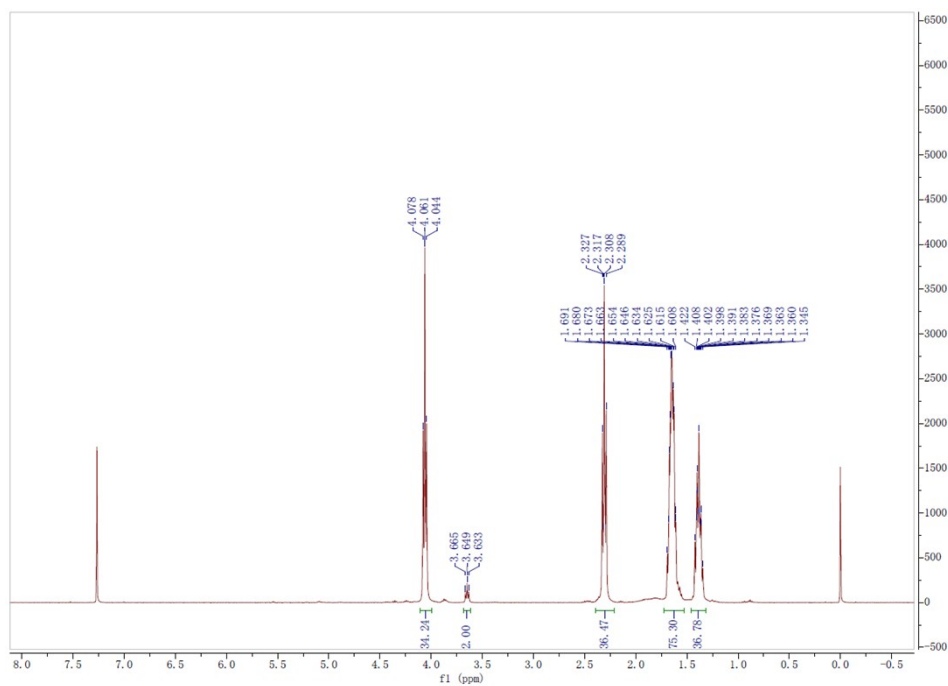

Figure S1. <sup>1</sup>H-NMR spectrum (CDCl<sub>3</sub>) of the star-PCL

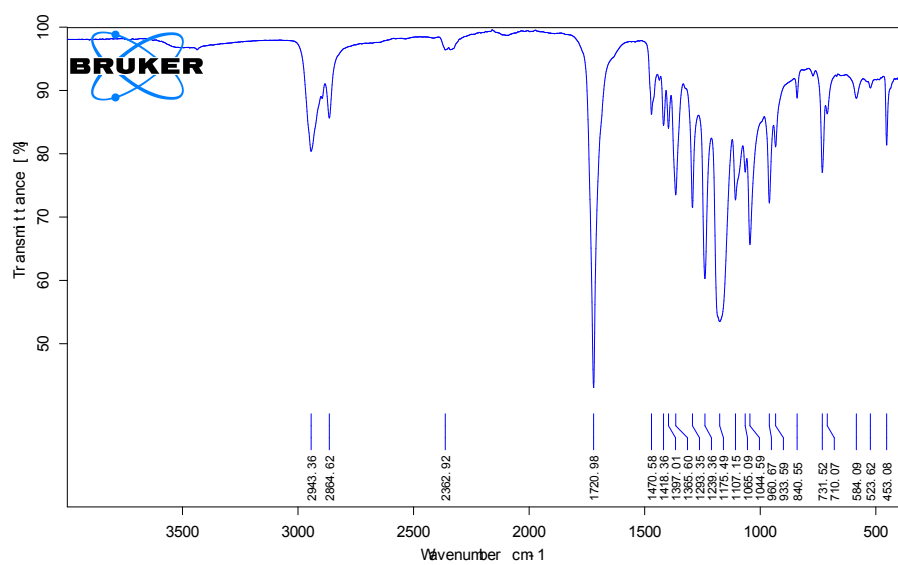

Figure S2. FT-IR spectra of the star-PCL
